1

## 2 MRCA time and epidemic dynamics of the 2019 novel coronavirus

3

4 Chi Zhang<sup>1,\*</sup> and Mei Wang

5 January 29, 2020

6

7 <sup>1</sup>Institute of Vertebrate Paleontology and Paleoanthropology, Chinese Academy of Sciences,  
8 Beijing 100044, China

9 \*Corresponding author: E-mail: zhangchi@ivpp.ac.cn

10

### 11 Abstract

12 The 2019 novel coronavirus (2019-nCoV) have emerged from Wuhan, China. Studying the  
13 epidemic dynamics is crucial for further surveillance and control of the outbreak. We employed  
14 a Bayesian framework to infer the time-calibrated phylogeny and the epidemic dynamics  
15 represented by the effective reproductive number ( $R_e$ ) changing over time from 33 genomic  
16 sequences available from GISAID. The time of the most recent common ancestor (MRCA)  
17 was December 17, 2019 (95% HPD: December 7, 2019 – December 23, 2019). The median  
18 estimate of  $R_e$  shifted from 1.6 to 1.1 on around January 1, 2020. This study provides an early  
19 insight of the 2019-nCoV epidemic. However, due to limited amount of data, one should be  
20 cautious when interpreting the results at this stage.

21

### 22 Introduction

23 An outbreak of a novel coronavirus (2019-nCoV) was reported in Wuhan, a city in central  
24 China (WHO). Coronaviruses cause diseases range from common cold to severe pneumonia.  
25 Two fatal coronavirus epidemics over the last two decades were severe acute respiratory  
26 syndrome (SARS) in 2003 and Middle East respiratory syndrome (MERS) in 2012 (WHO).  
27 Human to human transmission has been confirmed for this new type of coronavirus (Wang et  
28 al. 2020) and more than 8,000 cases have been reported as of January 29, 2020.

29 Studying the virus epidemic dynamics is crucial for further surveillance and control of the  
30 outbreak. Phylogeny of the viruses is a proxy of the transmission chain. In this study, we used  
31 the birth-death skyline serial (BDSS) model (Stadler et al. 2013) to infer the phylogeny,  
32 divergence times and epidemic dynamics of 2019-nCoV. This approach takes the genomic  
33 sequences and sampling times of the viruses as input, and co-estimates the phylogeny and key

34 epidemic parameters in a Bayesian framework while accounting for their uncertainties.  
35 Particularly, we estimated the shifting time and values of the effective reproductive number ( $R_e$ )  
36 to detect the effect of the intervention.

## 37 **Results and Discussion**

38 The sources of the genomic sequences are given in Table 1. The phylogeny in Figure 1 shows  
39 the divergence times and relationships of the 33 BetaCoV viruses. Note that this phylogeny is  
40 a maximum clade credibility (MCC) tree summarized from the posterior samples, which  
41 represents a best estimate of the topology. Due to the similarity of the sequences, the  
42 probabilities in most clades are very low ( $< 0.5$ ) and would form polytomies if summarized as  
43 a 50% majority-rule consensus tree (GISAID). The epidemic parameters were estimated while  
44 taking the topological uncertainties into account by averaging them in the Bayesian Markov  
45 chain Monte Carlo (MCMC) algorithm.

46 The time of the most recent common ancestor (MRCA) is estimated to be December 17,  
47 2019 (95% HPD: December 7, 2019 – December 23, 2019) (Table 2). This is in agreement with  
48 the symptom onset reported by WHO and several preliminary studies (<http://virological.org>).  
49 The origin time estimated is just a couple of days older than the MRCA time. It appears too  
50 young and likely due to unsampled cases not included in our analysis (du Plessis and Pybus  
51 2020).

52 We investigate the epidemic dynamics of 2019-nCoV by estimating  $R_e$  before and after a  
53 shifting time.  $R_e > 1.0$  means that the number of cases are increasing and the epidemic is  
54 growing, whereas  $R_e < 1.0$  means that the epidemic is declining and will die out. Interestingly,  
55 the median estimate of  $R_e$  shifted from 1.6 to 1.1 on around January 1, 2020 (Table 2). In  
56 general, this is in agreement with some other studies reporting  $R_e$  ranging from 1.4 to 5.5 (Read  
57 et al. 2020; Zhao et al. 2020; Riou and Althaus 2020) and the intervention happened around  
58 January 1 (Li et al. 2020).

59 Keep in mind that we used only 33 samples in our analysis, which is less than 1% of the  
60 reported number of infected patients, thus one needs to be cautious when interpreting the results.  
61 With more viruses sequenced, we would expect more reliable estimates which would provide  
62 better insights into the epidemic of 2019-nCoV.

63 Overall, this study provides an early insight of the 2019-nCoV epidemic by inferring key  
64 epidemiological parameters from the virus sequences. Such estimates would help public health  
65 officials to coordinate effectively to control the outbreak.

## 66 **Material and Methods**

67 We collected 33 genomic sequences available from GISAID (Table 1). Sequences were  
68 aligned using MUSCLE (Edgar 2004). The first and last 150bp were removed, resulting in a

69 total length of 29604bp for the alignment. The collection dates of the viruses ranged from  
70 December 24, 2019 to January 23, 2020 and they were used as fixed ages (in unit of years) in  
71 subsequent analysis.

72 We used the BDSS model (Stadler et al. 2013) implemented in the BDSKY package for  
73 BEAST 2 (Bouckaert et al. 2019) to infer the phylogeny, divergence times and epidemic  
74 dynamics of 2019-nCoV. The model has an important epidemiological parameter, the effective  
75 reproductive number  $R_e$ , defined as the number of expected secondary infections caused by an  
76 infected individual during the epidemic. The model allows  $R_e$  to change over time, making it  
77 feasible to estimate its dynamics (Stadler et al. 2013). In our case, we just allowed one shift of  
78  $R_e$  at time  $t_{\text{shift}}$  and co-estimated them. The prior for  $R_e$  was a lognormal(0, 1.25) distribution  
79 with median 1.0 and 95% quantiles between 0.13 and 7.82, and that for  $t_{\text{shift}}$  was  
80 normal(2020.010959, 0.010959) with mean on January 4 and standard deviation of 4 days. The  
81 BDSS process starts from the origin time  $t_0$ , which was assigned a lognormal(-1, 1.5) prior  
82 with median 0.368 (years before the latest sampling time). The other two parameters are the  
83 becoming noninfectious rate  $\delta$  and sampling proportion  $p$ , which were assumed constant over  
84 time.  $\delta$  was given a lognormal (2, 1.25) prior with median 7.39 and mean 16.1, expecting the  
85 infectious period of an individual ( $1/\delta$ ) to be about a month. The sampling proportion of  
86 infected individuals  $p$  was a beta(1, 9) distribution with mean 0.1.

87 We assumed a strict clock and the clock rate  $r$  was assigned a gamma(2, 0.0005) prior with  
88 mean of 0.001 substitutions per site per year. The substitution model used was HKY+ $\Gamma_4$   
89 (Hasegawa et al. 1985; Yang 1994) in which the transition-transversion rate ratio  $\kappa$  was set a  
90 lognormal(1, 1.25) prior and the gamma shape parameter  $\alpha$  was an exponential(1) prior.

91 The analysis was performed in the BEAST 2 platform (Bouckaert et al. 2019). We ran 100  
92 million MCMC iterations and sampled every 5000 iterations. The first 20% samples were  
93 discarded as burn-in. Convergence was diagnosed in Tracer (Rambaut et al. 2018) to confirm  
94 that independent runs gave consensus results and all parameters had effective sample size (ESS)  
95 larger than 100. The remaining 80% samples were used to build the maximum clade credibility  
96 (MCC) tree and to summarize the parameter estimates.

97

## 98 **Acknowledgments**

99 We thank Louis du Plessis for his valuable help and suggestions on the analysis.

100

## 101 **References**

102 Bouckaert R., Vaughan T.G., Barido-Sottani J., Duchêne S., Fourment M., Gavryushkina A.,  
103 Heled J., Jones G., Kühnert D., De Maio N., Matschiner M., Mendes F.K., Müller N.F.,

- 104 Ogilvie H.A., Plessis du L., Poppinga A., Rambaut A., Rasmussen D., Siveroni I., Suchard  
105 M.A., Wu C.-H., Xie D., Zhang C., Stadler T., Drummond A.J. 2019. BEAST 2.5: An  
106 advanced software platform for Bayesian evolutionary analysis. *PLoS Comput. Biol.*  
107 15:e1006650.
- 108 Chan J.F.-W., Yuan S., Kok K.-H., To K.K.-W., Chu H., Yang J., Xing F., Liu J., Yip C.C.-  
109 Y., Poon R.W.-S., Tsoi H.-W., Lo S.K.-F., Chan K.-H., Poon V.K.-M., Chan W.-M., Ip  
110 J.D., Cai J.-P., Cheng V.C.-C., Chen H., Hui C.K.-M., Yuen K.-Y. 2020. A familial  
111 cluster of pneumonia associated with the 2019 novel coronavirus indicating person-to-  
112 person transmission: a study of a family cluster. *The Lancet*.
- 113 Drummond A.J., Ho S.Y.W., Phillips M.J., Rambaut A. 2006. Relaxed phylogenetics and  
114 dating with confidence. *PLoS Biol.* 4:e88.
- 115 du Plessis L., Pybus O. 2020. nCoV-2019 origin time estimates (research note).
- 116 Edgar R.C. 2004. MUSCLE: multiple sequence alignment with high accuracy and high  
117 throughput. *Nucleic Acids Res.* 32:1792–1797.
- 118 GISAID. 2020 Coronavirus. <https://www.gisaid.org/CoV2020>.
- 119 Hasegawa M., Kishino H., Yano T. 1985. Dating of the human-ape splitting by a molecular  
120 clock of mitochondrial DNA. *J. Mol. Evol.* 22:160–174.
- 121 Li Q., Guan X., Wu P., Wang X., Zhou L., Tong Y., Ren R., Leung K.S.M., Lau E.H.Y.,  
122 Wong J.Y., Xing X., Xiang N., Wu Y., Li C., Chen Q., Li D., Liu T., Zhao J., Liu M., Tu  
123 W., Chen C., Jin L., Yang R., Wang Q., Zhou S., Wang R., Liu H., Luo Y., Liu Y., Shao  
124 G., Li H., Tao Z., Yang Y., Deng Z., Liu B., Ma Z., Zhang Y., Shi G., Lam T.T.Y., Wu  
125 J.T., Gao G.F., Cowling B.J., Yang B., Leung G.M., Feng Z. 2020. Early Transmission  
126 Dynamics in Wuhan, China, of Novel Coronavirus–Infected Pneumonia. *New England*  
127 *Journal of Medicine*.
- 128 Rambaut A., Drummond A.J., Xie D., Baele G., Suchard M.A. 2018. Posterior  
129 summarization in Bayesian phylogenetics using Tracer 1.7. *Syst. Biol.* 67:901–904.
- 130 Rannala B., Yang Z. 2007. Inferring speciation times under an episodic molecular clock.  
131 *Syst. Biol.* 56:453–466.
- 132 Stadler T., Kühnert D., Bonhoeffer S., Drummond A.J. 2013. Birth-death skyline plot reveals  
133 temporal changes of epidemic spread in HIV and hepatitis C virus (HCV). *Proc. Natl.*  
134 *Acad. Sci. USA.* 110:228–233.

- 135 Wang C., Horby P.W., Hayden F.G., Gao G.F. 2020. A novel coronavirus outbreak of global  
136 health concern. *The Lancet*.
- 137 World Health Organization (WHO). Novel Coronavirus – China.  
138 <https://www.who.int/csr/don/12-january-2020-novel-coronavirus-china>.
- 139 World Health Organization (WHO). Coronavirus. [https://www.who.int/health-](https://www.who.int/health-topics/coronavirus)  
140 [topics/coronavirus](https://www.who.int/health-topics/coronavirus).
- 141 Yang Z. 1994. Maximum likelihood phylogenetic estimation from DNA sequences with  
142 variable rates over sites: approximate methods. *J. Mol. Evol.* 39:306–314.
- 143 Zhou P., Yang X.-L., Wang X.-G., Hu B., Zhang L., Zhang W., Si H.-R., Zhu Y., Li B.,  
144 Huang C.-L., Chen H.-D., Chen J., Luo Y., Guo H., Jiang R.-D., Liu M.-Q., Chen Y.,  
145 Shen X.-R., Wang X., Zheng X.-S., Zhao K., Chen Q.-J., Deng F., Liu L.-L., Yan B.,  
146 Zhan F.-X., Wang Y.-Y., Xiao G., Shi Z.-L. 2020. Discovery of a novel coronavirus  
147 associated with the recent pneumonia outbreak in humans and its potential bat origin.  
148 bioRxiv.
- 149
- 150

151 Table 1. Data from GISAID

| Virus name                       | Accession ID   | Collection date |
|----------------------------------|----------------|-----------------|
| BetaCoV/Wuhan/IVDC-HB-01/2019    | EPI_ISL_402119 | 2019/12/30      |
| BetaCoV/Wuhan/IVDC-HB-04/2020    | EPI_ISL_402120 | 2020/1/1        |
| BetaCoV/Wuhan/IVDC-HB-05/2019    | EPI_ISL_402121 | 2019/12/30      |
| BetaCoV/Wuhan/IPBCAMS-WH-01/2019 | EPI_ISL_402123 | 2019/12/24      |
| BetaCoV/Wuhan/WIV04/2019         | EPI_ISL_402124 | 2019/12/30      |
| BetaCoV/Wuhan-Hu-1/2019          | EPI_ISL_402125 | 2019/12/26      |
| BetaCoV/Wuhan/WIV02/2019         | EPI_ISL_402127 | 2019/12/30      |
| BetaCoV/Wuhan/WIV05/2019         | EPI_ISL_402128 | 2019/12/30      |
| BetaCoV/Wuhan/WIV06/2019         | EPI_ISL_402129 | 2019/12/30      |
| BetaCoV/Wuhan/WIV07/2019         | EPI_ISL_402130 | 2019/12/30      |
| BetaCoV/Wuhan/HBCDC-HB-01/2019   | EPI_ISL_402132 | 2019/12/30      |
| BetaCoV/Wuhan/IPBCAMS-WH-04/2019 | EPI_ISL_403929 | 2019/12/30      |
| BetaCoV/Wuhan/IPBCAMS-WH-03/2019 | EPI_ISL_403930 | 2019/12/30      |
| BetaCoV/Wuhan/IPBCAMS-WH-02/2019 | EPI_ISL_403931 | 2019/12/30      |
| BetaCoV/Guangdong/20SF012/2020   | EPI_ISL_403932 | 2020/1/14       |
| BetaCoV/Guangdong/20SF013/2020   | EPI_ISL_403933 | 2020/1/15       |
| BetaCoV/Guangdong/20SF014/2020   | EPI_ISL_403934 | 2020/1/15       |
| BetaCoV/Guangdong/20SF025/2020   | EPI_ISL_403935 | 2020/1/15       |
| BetaCoV/Guangdong/20SF028/2020   | EPI_ISL_403936 | 2020/1/17       |
| BetaCoV/Guangdong/20SF040/2020   | EPI_ISL_403937 | 2020/1/18       |
| BetaCoV/Nonthaburi/61/2020       | EPI_ISL_403962 | 2020/1/8        |
| BetaCoV/Nonthaburi/74/2020       | EPI_ISL_403963 | 2020/1/13       |
| BetaCoV/Zhejiang/WZ-01/2020      | EPI_ISL_404227 | 2020/1/16       |
| BetaCoV/Zhejiang/WZ-02/2020      | EPI_ISL_404228 | 2020/1/17       |
| BetaCoV/USA/IL1/2020             | EPI_ISL_404253 | 2020/1/21       |
| BetaCoV/USA/WA1/2020             | EPI_ISL_404895 | 2020/1/19       |
| BetaCoV/Taiwan/2/2020            | EPI_ISL_406031 | 2020/1/23       |
| BetaCoV/USA/CA1/2020             | EPI_ISL_406034 | 2020/1/23       |
| BetaCoV/USA/CA2/2020             | EPI_ISL_406036 | 2020/1/22       |
| BetaCoV/USA/AZ1/2020             | EPI_ISL_406223 | 2020/1/22       |
| BetaCov/Wuhan/WH01/2019          | EPI_ISL_406798 | 2019/12/26      |
| BetaCov/Wuhan/WH03/2020          | EPI_ISL_406800 | 2020/1/1        |
| BetaCov/Wuhan/WH04/2020          | EPI_ISL_406801 | 2020/1/5        |

152

153

154 Table 2. Posterior estimates of key model parameters

|             | median and 95% HPD interval      |
|-------------|----------------------------------|
| $t_0$       | 0.1089 (0.0871, 0.1505)          |
| $t_{mrca}$  | 0.1005 (0.0852, 0.1284)          |
| $R_{e1}$    | 1.57 (0.78, 3.64)                |
| $R_{e2}$    | 1.13 (0.67, 1.81)                |
| $t_{shift}$ | 2020.0020 (2019.9830, 2020.0311) |
| $\delta$    | 84.91 (18.37, 187.64)            |
| $p$         | 0.19 (0.019, 0.43)               |
| $r$         | 0.0016 (0.00076, 0.0027)         |
| $\kappa$    | 5.05 (2.05, 9.34)                |
| $\alpha$    | 0.67 (0.0011, 3.03)              |

155 Note: time unit is years.

156

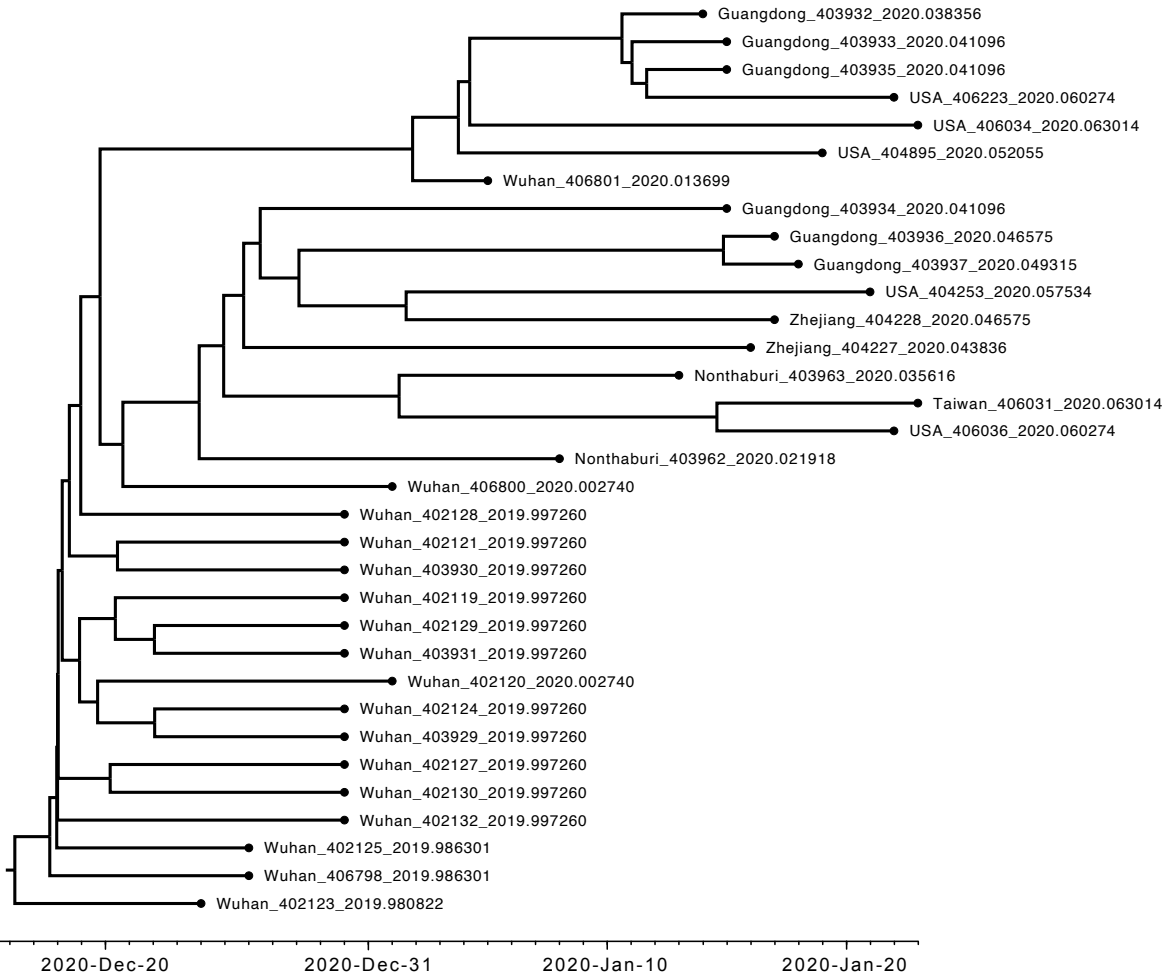

157

158 Figure 1. Maximum clade credibility (MCC) tree summarized from the MCMC sample. The  
159 common ancestor heights were used to annotate the clade ages.

160
